# Supplementary material for: Immune Checkpoint Inhibitors and Long-term Survival of Patients With Metastatic Urothelial Cancer
Source: PubMed Central journal article supplement (PMC10098944; doi:10.1001/jamanetworkopen.2023.7444), 2023-04-12
Supplement: jamanetwopen-e237444-s001.pdf [file jamanetwopen-e237444-s001.pdf]

## Data Sharing Statement

Zhu. Immune Checkpoint Inhibitors and Long-term Survival of Patients With Metastatic Urothelial Cancer. *JAMA Netw Open*. Published April 12, 2023.

doi:10.1001/jamanetworkopen.2023.7444

### Data

**Data available:** Yes

**Data types:** Data (not involving human participants)

**How to access data:** Data can be made available upon request. Please contact [alz9028@nyp.org](mailto:alz9028@nyp.org).

**When available:** With publication

### Supporting Documents

**Document types:** None

### Additional Information

**Who can access the data:** Anyone requesting the data

**Types of analyses:** For any purpose

**Mechanisms of data availability:** With investigator support
